1 **Meropenem vs standard of care for treatment of neonatal late onset sepsis (NeoMero1):**  
2 **a randomised controlled trial**

3 Irja LUTSAR MD<sup>1</sup>, Corine CHAZALLON MSc<sup>2</sup>, Ursula TRAJNER MD<sup>3</sup>, Vincent  
4 MEIFFREY de CABRE MD<sup>2</sup>, Cinzia AURITI MD<sup>4</sup>, Chiara BERTAINA MD<sup>5</sup>, Francesca  
5 Ippolita CALO CARDUCCI MD<sup>5</sup>, Fuat Emre CANPOLAT<sup>6</sup>, Susanna ESPOSITO MD<sup>7</sup>,  
6 Isabelle FOURNIER MD<sup>2</sup>, Maarja HALLIK MD<sup>8</sup>, Paul T. HEATH FRCPC<sup>9</sup>, Mari-Liis  
7 ILMOJA MD<sup>1,8</sup>, Elias IOSIFIDIS MD<sup>10</sup>, Jelena KUZNETSOVA MD<sup>11</sup>, Laurence Meyer  
8 MD<sup>2</sup>, Tuuli METSVAHT MD<sup>1,11</sup>, George MITSIAKOS MD<sup>12</sup>, Zoi Dorothea PANA MD<sup>10</sup>,  
9 Fabio MOSCA MD<sup>13</sup>, Lorenza PUGNI MD<sup>13</sup>, Emmanuel ROILIDES MD<sup>10</sup>, Paolo ROSSI  
10 MD<sup>5</sup>, Kosmas SARAFIDIS MD<sup>14</sup>, Laura SANCHEZ<sup>15</sup>, Michael SHARLAND MD<sup>9</sup>, Vytautas  
11 USONIS Hab.dr.med<sup>16</sup>, Adilia WARRIS MD<sup>17</sup>, Jean-Pierre ABOULKER MD<sup>2</sup>, Carlo  
12 GIAQUINTO MD<sup>18</sup> and on behalf of NeoMero Consortium

13 <sup>1</sup> University of Tartu, Institute of Translational Medicine, Ravila 19, 50435 Tartu, Estonia

14 <sup>2</sup> INSERM SC10-US19, Villejuif, France

15 <sup>3</sup> Neonatal Intensive Care Unit, Women's and Children's Health Department, Azienda  
16 Ospedaliera-University of Padua, Via Giustiniani 3, 35128 Padua-Italy

17 <sup>4</sup> Neonatal Intensive Care Unit, Department of Neonatology, Bambino Gesù Children's  
18 Hospital, IRCCS, Rome Italy

19 <sup>5</sup> Immunological and Infectious Disease Unit, University Department of Paediatrics, Bambino  
20 Gesù Children's Hospital, IRCCS, Rome, Italy

21 <sup>6</sup> Sağlık Bilimleri Üniversitesi, Zekai Tahir Burak Kadın Sağlığı Eğitim ve Araştırma  
22 Hastanesi, Neonatoloji Kliniği, 06230, Ankara, Turkey

23 <sup>7</sup> Pediatric Highly Intensive Care Unit, Università degli Studi di Milano, Fondazione IRCCS  
24 Ca' Granda Ospedale Maggiore Policlinico, Via Della Commenda 12, Milan, Italy

25 <sup>8</sup> Tallinn Children's Hospital, Department of Intensive Care, Tervise 28, 13419 Tallinn,  
26 Estonia

27 <sup>9</sup> Paediatric Infectious Disease Research Group, Institute for Infection and Immunity, St  
28 George's University of London, London, UK

29 <sup>10</sup> Infectious Diseases Unit, 3<sup>rd</sup> Department of Pediatrics, Faculty of Medicine, Aristotle  
30 University School of Health Sciences, Hippokration Hospital, Konstantinoupolis 49, 54642  
31 Thessaloniki, Greece

- 32 <sup>11</sup> Tartu University Hospital, Clinic of Anaesthesiology and Intensive Care, Puusepa 1a,  
33 50406 Tartu, Estonia
- 34 <sup>12</sup> 2<sup>nd</sup> Department of Neonatology, Faculty of Medicine, Aristotle University School of Health  
35 Sciences, Papageorgiou Hospital, Nea Efkarpia, 56429 Thessaloniki, Greece
- 36 <sup>13</sup> Neonatal Intensive Care Unit, Università degli Studi di Milano, Fondazione IRCCS Ca'  
37 Granda Ospedale Maggiore Policlinico, Via Della Commenda 12, Milan, Italy
- 38 <sup>14</sup> 1st Department of Neonatology, Faculty of Medicine, Aristotle University School of Health  
39 Sciences, Hippokration Hospital, Konstantinoupoleos 49, 54642 Thessaloniki, Greece
- 40 <sup>15</sup> Hospital Universitario Infantil LA PAZ- H. Carlos III, Madrid, Spain
- 41 <sup>16</sup> Faculty of Medicine, Vilnius University, Santariskiu 4, LT-08406 Vilnius, Lithuania
- 42 <sup>17</sup> MRC Centre for Medical Mycology, Institute of Medical Sciences, University of Aberdeen,  
43 UK
- 44 <sup>18</sup> Department of Women's and Children's Health, University of Padova, Padova, Italy.

45

46 **Corresponding author:** Irja Lutsar  
47 Institute of Translational Medicine  
48 University of Tartu  
49 Irja.lutsar@ut.ee

50

51

52

53

54

## 55 **Abstract**

56

### 57 **Background**

58 The early use of broad-spectrum antibiotics remains the cornerstone for the treatment of  
59 neonatal late onset sepsis (LOS). However, which antibiotics should be used is still debatable,  
60 as relevant studies were conducted more than 20 years ago, were single centre or country,  
61 insufficiently powered, evaluated antibiotics not in clinical use anymore and had variable  
62 inclusion/exclusion criteria and outcome measures. Moreover, antibiotic-resistant bacteria  
63 have become a major problem in many countries worldwide. We hypothesized that efficacy of  
64 meropenem as a broad spectrum antibiotic is superior to standard of care regimen (SOC) in  
65 empiric treatment of LOS and thus aimed to compare the efficacy and safety of meropenem to  
66 SOC in infants aged <90 days with LOS.

### 67 **Methods and findings**

68 NeoMero-1 was a randomized, open-label, phase III superiority trial conducted in 18 neonatal  
69 units in 6 countries. Infants with post-menstrual age (PMA) of  $\leq 44$  weeks with positive blood  
70 culture and one, or those with negative culture and at least with two predefined clinical and  
71 laboratory signs suggestive of LOS, or those with PMA  $>44$  weeks meeting the Goldstein  
72 criteria of sepsis, were randomized in a 1:1 ratio to receive meropenem or SOC  
73 (ampicillin+gentamicin or cefotaxime+gentamicin) for 8-14 days. The primary outcome was  
74 treatment success (survival, no modification of allocated therapy, resolution/improvement of  
75 clinical and laboratory markers, no need of additional antibiotics and presumed/confirmed  
76 eradication of pathogens) at test-of-cure visit (TOC) in full analysis set. Stool samples were  
77 tested at baseline and day 28 for meropenem-resistant Gram-negative organisms (CRGNO).

78 The primary analysis was performed in all randomised patients (full analysis set) and in  
79 patients with culture confirmed LOS. Proportions of participants with successful outcome  
80 were compared by using a logistic regression model adjusted for the stratification factors.

81 From September 3rd 2012 to November 30th 2014, in total 136 patients in each arm were  
82 randomized; 140 (52%) were culture positive. Success at TOC was achieved in 44/136 (32%)  
83 in the meropenem arm vs. 31/135 (23%) in the SOC arm ( $p=0.087$ ); 17/63 (27%) vs. 10/77  
84 (13%) in patients with positive cultures ( $p=0.022$ ). The main reason of failure was  
85 modification of allocated therapy. Adverse events occurred in 72% and serious adverse events  
86 in 17% of patients, the mortality rate was 6% with no differences between study arms.  
87 Cumulative acquisition of CRGNO by day 28 occurred in 4% in the meropenem and 12% in  
88 the SOC arm ( $p=0.052$ ).

## 89 **Conclusions**

90 Meropenem was not superior to SOC in terms of success at TOC, short term hearing  
91 disturbances, safety or mortality and did not outselect colonization with CRGNOs.

92 Meropenem as broad-spectrum antibiotic should be reserved for neonates who are more likely  
93 to have Gram-negative LOS, especially in NICUs where microorganisms producing ESBL  
94 and AmpC beta-lactamases are circulating.

95

96

97

98

99

## 100 Introduction

101

102 Despite significant changes in neonatal care over the last several decades, late onset bacterial  
103 sepsis (LOS) is still one of the leading causes of neonatal morbidity and mortality in  
104 developing but also in highly developed countries [1-3]. Although LOS is predominantly  
105 caused by coagulase negative staphylococci (CoNS) (36-66% of cases), Gram-negative rods  
106 are responsible for about 26-36% of cases [3, 4].

107 The early use of broad spectrum antibiotic regimens remains the cornerstone for the treatment  
108 of LOS. However, which antibiotic regimen should be used is still debatable, as relevant  
109 studies were conducted more than 20 years ago, were single centre or single country,  
110 insufficiently powered, evaluated antibiotics not in clinical use anymore and had variable  
111 inclusion/exclusion criteria and outcome measures [5, 6]. As a result, most antibiotics are  
112 prescribed off-label in neonates [7, 8] and treatment guidelines are based on expert opinion  
113 rather than on evidence from randomised controlled trials (RCT) [9]. As an example of this,  
114 we showed that 49 different antibiotic regimens were used for the empiric treatment of LOS  
115 in 111 patients across Europe [10]. In addition, there is significant variation in antibiotic,  
116 including meropenem, dosing in neonatal intensive care units (NICUs) [11]. The issue is now  
117 further complicated by the rise of antibiotic resistance in NICUs worldwide [12] and the  
118 paucity of new antibiotics entering the market [13-15].

119 Meropenem is a low protein-bound (2%), broad-spectrum carbapenem with activity against a  
120 wide variety of Gram-positive and Gram-negative bacteria including anaerobes and extended  
121 spectrum and AmpC chromosomal  $\beta$ -lactamase producing *Enterobacteriaceae*. Meropenem  
122 has been used off-label in NICUs for more than a decade [16] because of concerns around  
123 high rates of extended spectrum beta-lactamase producing enterobacteria and is now the  
124 second most commonly used antibiotic [11, 17]. The advantage of meropenem is its wider

125 antibacterial coverage and thus potential of using monotherapy instead of combination  
126 therapy. However, there is serious concern around selection of carbapenem-resistant Gram-  
127 negative organisms (CRGNO)[18].

128 The safety and effectiveness of meropenem was recently evaluated in a single arm study  
129 including 200 infants < 91 days with suspected or confirmed intraabdominal infections. In this  
130 study, however, only 11% of patients received meropenem as monotherapy and only 15%  
131 (29/200) had positive blood cultures. The study demonstrated that meropenem was well  
132 tolerated and efficacious [19]. Meropenem was included in the European Medicines Agency  
133 priority list of off-patent drugs for which studies in neonates are requested  
134 ([http://www.ema.europa.eu/docs/en\\_GB/document\\_library/Other/2013/05/WC500143379.pdf](http://www.ema.europa.eu/docs/en_GB/document_library/Other/2013/05/WC500143379.pdf)  
135 ).

136 The general aim of the study was to suggest the appropriate use of meropenem in settings  
137 with low and medium level multi-drug resistance. Thus, the efficacy and safety of meropenem  
138 with a predefined standard of care (SOC) regimen for the treatment of LOS in patients  
139 admitted to NICU were compared. The distribution of LOS-causing microorganisms and their  
140 antibiotic susceptibility, relapse- and new infection rates, short term outcome of LOS and  
141 mucosal colonisation with CRGNO were also evaluated.

## 142 **Methods**

### 143 **Study design and participants**

144

145 NeoMero-1 was a randomised, open-label study conducted in 18 NICUs in Estonia, Greece,  
146 Italy, Lithuania, Spain and Turkey [20]. Patients with LOS and postnatal age (PNA)  $\leq$  90 days  
147 were eligible for inclusion. Culture confirmed LOS was defined as the presence of at least one  
148 positive culture from a normally sterile site together with at least one abnormal clinical or

149 laboratory parameter within the 24 hours prior to randomisation as demonstrated in Table 1  
150 [20]. Clinical sepsis criteria were based on postmenstrual age (PMA). If PMA was > 44  
151 weeks the International Paediatric Sepsis Consensus Conference criteria had to be met [21].  
152 For patients with PMA  $\leq$  44 weeks the criteria defined by the European Medicines Agency  
153 Expert Meeting on Neonatal and Paediatric Sepsis [5, 20] were used and the presence of at  
154 least two clinical and two laboratory parameters were required (Table 1).  
155 Table 1. Clinical and laboratory parameters defining LOS in patients with PMA  $\leq$  44 weeks

|                                                                                                                                                                                                                                                                                                                                                                                                                                                                         |
|-------------------------------------------------------------------------------------------------------------------------------------------------------------------------------------------------------------------------------------------------------------------------------------------------------------------------------------------------------------------------------------------------------------------------------------------------------------------------|
| <b>Clinical parameters</b>                                                                                                                                                                                                                                                                                                                                                                                                                                              |
| 1. hyper- or hypothermia or temperature instability;<br>2. reduced urinary output or hypotension or mottled skin or impaired peripheral perfusion;<br>3. apnea or increased oxygen requirement or need for ventilatory support;<br>4. bradycardia spells or tachycardia or rhythm instability;<br>5. feeding intolerance or abdominal distension;<br>6. lethargy or hypotonia or irritability;<br>7. skin and subcutaneous lesions (such as petechial rash or sclerema) |
| <b>Laboratory parameters</b>                                                                                                                                                                                                                                                                                                                                                                                                                                            |
| 1. white blood cell count $< 4$ or $> 20 \times 10^9$ cells/L;<br>2. immature to total neutrophil ratio $> 0.2$ ;<br>3. platelet count $< 100 \times 10^9$ /L;                                                                                                                                                                                                                                                                                                          |

4. C-reactive protein > 15 mg/L or procalcitonin  $\geq$  2 ng/mL;
5. glucose intolerance when receiving normal glucose amounts (8-15 g/kg/day) as expressed by blood glucose values > 180 mg/dL or hypoglycemia (<40 mg/dL) confirmed on at least two occasions;
6. acidosis with base excess (BE) < -10 mmol/L or lactate above 2 mmol/L

156

157 Patients who had received systemic antibiotics for more than 24 hours within the 7 days prior  
158 to randomisation (except treatment failures), had meningitis and/or organisms suspected or  
159 known to be resistant to study antibiotics, were not expected to survive for more than three  
160 months, had renal failure and/or required hemofiltration or peritoneal dialysis, were excluded.

## 161 **Randomisation**

162

163 Patients were centrally randomised using a computer generated randomisation list (1:1 ratio)  
164 to either meropenem or one of the two SOC regimens (ampicillin + gentamicin or cefotaxime  
165 + gentamicin) chosen by each site prior to the start of the study. Patients were stratified by  
166 SOC regimen and use of systemic antibiotics for LOS in the 24 hours prior to randomisation.

## 167 **Procedures**

168

169 Meropenem was given via 30-minute intravenous infusion at a dose of 20 mg/kg q8h with the  
170 exception of those with gestational age (GA) < 32 weeks and PNA <2 weeks who received  
171 the same dose q12h with the possibility to increase dosing frequency to q8h from a PNA of  
172 two weeks. Ampicillin, cefotaxime and gentamicin were administered according to the British  
173 National Formulary for Children (BNFC, [www.bnfc.org](http://www.bnfc.org)). Total duration of allocated therapy  
174 was predefined as 8 to 14 days. The concomitant use of other systemic antibiotics was not



175 allowed with the exceptions of vancomycin, teicoplanin or linezolid, if started pre-  
176 randomisation. The use of topical anti-infectives, systemic antifungals, antivirals,  
177 immunoglobulins and probiotics was permitted.

178 Patients were examined at Day 0 (screening and randomisation), Day 3, end of antibacterial  
179 therapy (EOT) and test of cure (TOC) visit, which was performed  $2 \pm 1$  days after EOT for  
180 patients treated with antibiotics for the predefined duration ( $11 \pm 3$  days). Short-term follow-  
181 up visit was performed on Day 28 by on-site visit or telephone call.

182 Microbiological samples were taken at baseline, Day 3, on appearance of any new signs  
183 suggestive of LOS and repeated until the relevant microorganisms were no longer detected.  
184 All samples were processed at local laboratories according to their own guidelines. In a post-  
185 hoc analysis two experts (IL and JG) reviewed susceptibility data and categorised organisms  
186 as susceptible, non-susceptible to study antibiotics, or not possible to categorise. Rectal swabs  
187 were collected within 72 hours of baseline, at EOT and at Day 28 visit or NICU discharge,  
188 and stored locally at  $-80^{\circ}\text{C}$  before being periodically transferred to the central Biobank. The  
189 samples were then sent in regular batches to St George's, University of London, Department  
190 of Medical Microbiology. The thawed faecal samples were cultured using selective media and  
191 tested for carbapenem resistance according to EUCAST guidelines  
192 ([http://www.eucast.org/ast\\_of\\_bacteria/guidance\\_documents](http://www.eucast.org/ast_of_bacteria/guidance_documents)). The isolate was considered  
193 CRGNO if phenotypic resistance was detected to meropenem or if *Stenotrophomonas*  
194 *maltophilia* was isolated, and to be highly CRGNO if meropenem MIC values were  $\geq 8$  mg/L.  
195 Acquisition of CRGNO during the study was defined if these microorganisms were not  
196 detected at baseline but were found in subsequent colonisation cultures.

197 Hearing was assessed according to local protocol between EOT and Day 28 visit.

198 Cerebral ultrasound (and if persistently abnormal, magnetic resonance imaging or computed  
199 tomography) was undertaken at any time between EOT and Day 28 visit.

200 Blood and cerebrospinal fluid samples were collected for pharmacokinetic assessment; the  
201 results of this are reported separately [22].

## 202 **Outcomes**

203

204 The composite primary endpoint was assessed at the TOC visit and defined as success if (1)  
205 the patient was alive, and (2) all baseline clinical and laboratory parameters that defined LOS  
206 were resolved or improved, (3) there was no need to continue antibiotics, (4) the baseline  
207 microorganisms were eradicated or presumably eradicated with no new microorganisms  
208 identified, and (5) allocated therapy was given for  $11 \pm 3$  days without any modification for  
209 more than 24 hours.

210 The secondary outcomes were safety, clinical and laboratory response on Day 3, and EOT,  
211 survival at Day 28, time to NICU discharge, presence of hearing disturbances and  
212 abnormalities in brain ultrasound, acquisition of CRGNO in rectal swabs and occurrence of  
213 relapses or new infections after successful outcome at TOC visit until Day 28. Clinical  
214 relapses were defined as recurrence of LOS together with initiation of a new course of  
215 antibiotic treatment, and microbiological relapse as an isolation of a phenotypically similar  
216 organism from a normally sterile site in a patient with signs of infection.

## 217 **Statistical analysis**

218

219 On limited data available, we estimated that failure rate in the control arm would be 36% [2].  
220 The required sample size to show a reduction of failure rate by about a third (from 36% to  
221 23%) with 80% power in the meropenem arm using a 2-sided test at an alpha level of 0.05,  
222 was 220 patients per arm. Using a clinical definition of LOS, an ineligibility rate of 15% to

223 20% was anticipated. The sample size was thus conservatively increased to 275 subjects per  
224 arm to compensate for the dilution effect. Recruitment was closed on November 30th, 2014 at  
225 272 patients randomised, due to expiration of funding by the European Commission.  
226 Considering the unexpected overall high rate of failures (70% instead of 36% due to frequent  
227 modifications of allocated therapy) and the very low percentage of subjects not having LOS,  
228 we calculated that the study had already yielded 80% power to show a 20% reduction of the  
229 failure rate, well beyond the objective of the trial.

230 The primary analysis included all randomised patients (full analysis set - FAS). Analysis of  
231 the primary endpoint was also performed in patients with culture confirmed LOS. Proportions  
232 of participants with successful outcome were compared by using a logistic regression model  
233 adjusted for the stratification factors. Additional efficacy analyses were performed by  
234 ignoring the changes in allocated therapy due to safety reasons or all changes of allocated  
235 therapy and by allowing duration of allocated therapy between 7 and 14 days. Other efficacy  
236 endpoints included clinical response at Day 3, end of allocated therapy and EOT, new  
237 infection and/or relapse by day 28.

238 Survival at day 28 was described using Kaplan-Meier method and curves were compared  
239 using a log rank test. A significance level of 5% was used and all p-values were the results of  
240 two sided tests.

241 All analyses were performed with the use of SAS software, version 9.3 (SAS institute).

## 242 **Ethics and registration**

243

244 The local Ethics Committees approved the study protocol. The informed consent was signed  
245 by parents/guardians prior to randomisation.

246 The study was overseen by an independent data safety monitoring board and was registered in  
247 EudraCT database (2011-001515-31) and in [clinicaltrials.gov](http://clinicaltrials.gov) (NCT01551394).

## 248 **Role of funding source**

249 This study was funded by the European Commission under the FP7 program (grant number  
250 242146) but they had no role in study design or in the analysis of data. Chiesi Farmaceutici  
251 S.P.A. provided meropenem and collaborated in the study management.

## 252 **Results**

### 253 **Study population and baseline characteristics**

254

255 A total of 277 infants were consented and 136 in each arm underwent randomization from  
256 September 3rd 2012 to November 30th 2014. In the SOC arm 48 (35%) patients were  
257 assigned to ampicillin + gentamicin and 88 (65%) to cefotaxime + gentamicin (Figure 1). One  
258 patient with a major informed consent violation in the SOC arm was excluded leaving 271  
259 patients to be analysed for efficacy; 140 (52%) of them had culture proven LOS. There were  
260 268 (99%) patients who received at least one dose of allocated therapy and were included in  
261 the safety analysis.

262

263 **Figure 1.** Flowchart of the study NeoMero-1. EOS – early onset sepsis; SOC – standard of  
264 care; FAS – full analysis set; AT – allocated therapy; LOS – late onset sepsis; FU – follow-up

265

266

267

268

269

270

271

272

273

274

275

276

277

278

279

280

281

282

283

284

285

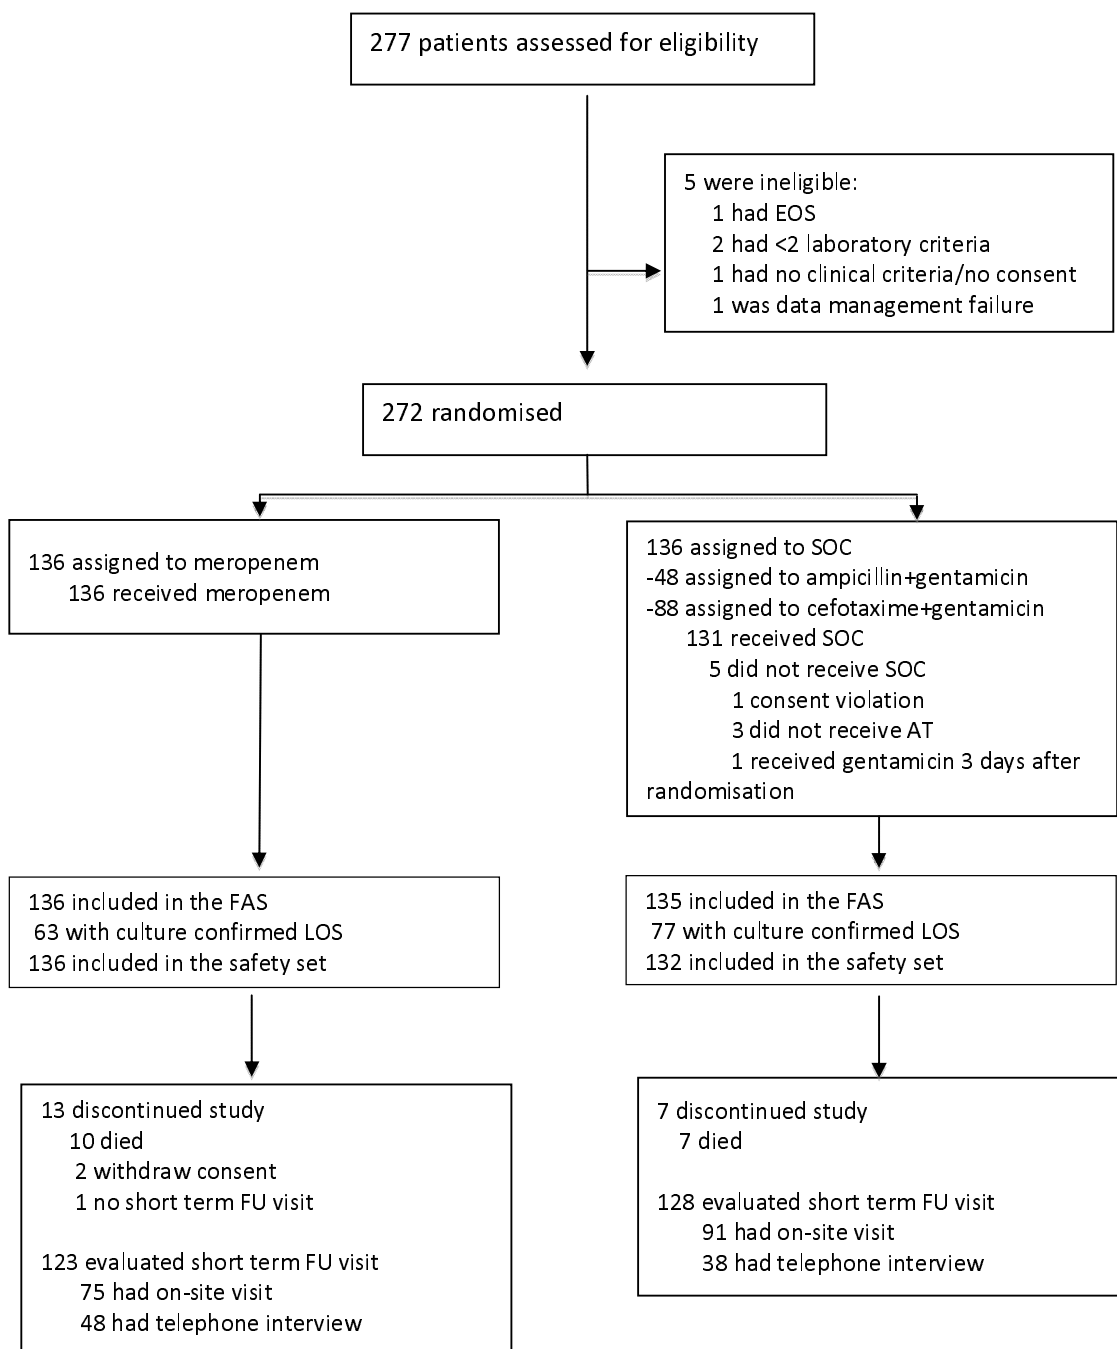

286 The baseline characteristics of patients were well balanced between both arms (Table 2). They

287 were also similar when patients were sub-grouped according to prior antibiotic treatment,

288 culture proven LOS or presence of Gram-positive or Gram-negative LOS (data not shown).  
 289 Patients in the ampicillin+gentamicin sites were more mature than those in the cefotaxime+  
 290 gentamicin sites (median PMA 39.8 vs. 32.3 weeks and median BW 2560g vs. 1105g,  
 291 respectively;  $p < 0.0001$  for both).

292 **Table 2.** Characteristics of study population in meropenem and SOC arm at baseline (FAS  
 293 population). Data are presented as numbers (%) if not stated otherwise

| Characteristic                      | Meropenem<br>N = 136 (%) | SOC<br>N = 135 (%) |
|-------------------------------------|--------------------------|--------------------|
| <b>Demographics</b>                 |                          |                    |
| Median GA weeks (IQR)               | 31.6 (26.4 - 37.3)       | 30.6 (27.0 - 36.3) |
| <28 weeks                           | 41 (30%)                 | 41 (30%)           |
| 28-32 weeks                         | 31 (23%)                 | 38 (28%)           |
| 32-37 weeks                         | 26 (19%)                 | 23 (17%)           |
| $\geq 37$ weeks                     | 38 (28%)                 | 33 (24%)           |
| Median PNA days (IQR)               | 16 (8 - 30)              | 16 (8 - 30)        |
| Median PMA days (IQR)               | 34.5 (30.5 - 40.7)       | 33.8 (29.9 - 40.1) |
| PMA > 44 weeks n (%)                | 5 (3.7%)                 | 6 (4.4%)           |
| Male n (%)                          | 72 (53%)                 | 72 (53%)           |
| Median (IQR) birth weight (g)       | 1540 (840 - 2830)        | 1340 (850 - 2530)  |
| -BW <1000 g (n)                     | 45 (33%)                 | 51 (38%)           |
| -BW <1500 g (n)                     | 67 (49%)                 | 80 (59%)           |
| -BW >2500 g (n)                     | 43 (32%)                 | 37 (27%)           |
| SGA *n (%)                          | 33 (24%)                 | 34 (25%)           |
| <b>Peri- or neonatal conditions</b> |                          |                    |
| Multiple births                     | 29 (21%)                 | 32 (24%)           |

|                                                     |                   |                   |
|-----------------------------------------------------|-------------------|-------------------|
| Medically assisted fertilisation                    | 21 (16%)          | 15 (11%)          |
| Antenatal steroids                                  | 65 (48%)          | 71 (53%)          |
| Congenital conditions:                              |                   |                   |
| -Respiratory                                        | 18 (13%)          | 17 (13%)          |
| -Cardiovascular                                     | 13 (10%)          | 11 (8%)           |
| -Gastrointestinal                                   | 8 (6%)            | 10 (7%)           |
| -Neurological                                       | 8 (6%)            | 4 (3%)            |
| -Other                                              | 6                 | 6                 |
| Surgery                                             | 23 (17%)          | 29 (21%)          |
| Arterial catheters                                  | 27 (20%)          | 32 (24%)          |
| Central Venous Catheter                             | 64 (47%)          | 69 (51%)          |
| Mechanically ventilated                             | 75 (56%)          | 74 (55%)          |
| Received antibiotics prior to randomisation         | 100 (74%)         | 98 (73%)          |
| Median duration of prior antibiotic therapy (hours) | 18.5 (9.0 - 22.1) | 16.0 (8.3 - 21.2) |
| Received meropenem prior to randomisation           | 35 (26%)          | 29 (21%)          |

294 \* defined by birth weight  $\leq 10^{\text{th}}$  percentile; IQR – interquartile range,

295

296 In total 200 (74%) patients were premature (35% with birth weight <1000 g) and only 11 had  
 297 a PMA >44 weeks. In the 24 hours prior to randomisation 73% of patients had received  
 298 antibiotics; 24% had received meropenem with a similar frequency in both study arms (Table  
 299 2).

300 Patients of PMA  $\leq$ 44 weeks had a median (IQR) of 3 (3-4) clinical and 2 (2-3) laboratory  
301 signs at baseline, in both arms. Clinical or laboratory signs seen in more than 50% of patients  
302 were impaired peripheral perfusion, mottled skin, CRP >15 mg/L and lactate >2 mmol/L  
303 (Figure 2).

304 Figure 2. Distribution of Clinical criteria of LOS at baseline in patients of PMA < 44 weeks  
305 with clinical (C) and culture proven (P) LOS.

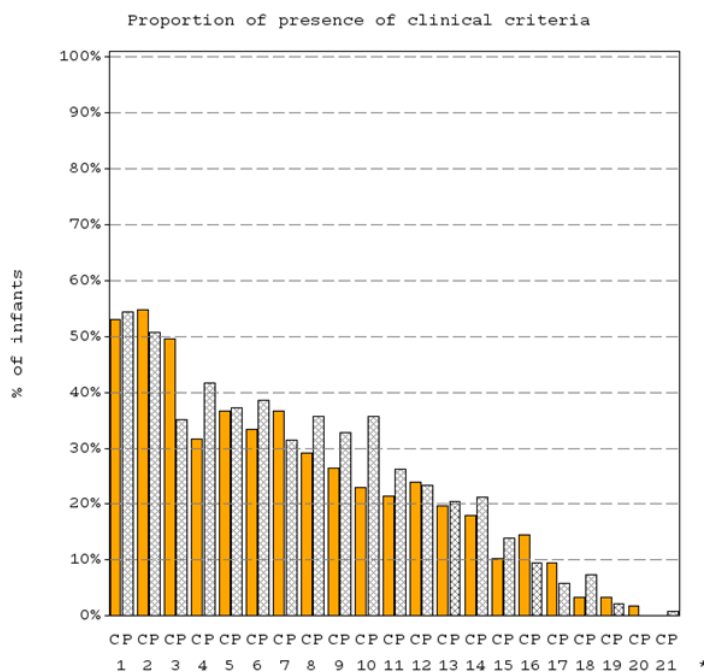

306

307 The numbers represent the following clinical signs: **1-** Impaired peripheral perfusion, **2-** Mottled skin, **3-** Feeding  
308 intolerance, **4-** Apnoea, **5-** Increased oxygen requirement, **6-** Requirement for ventilation support, **7-** Abdominal  
309 distension, **8-** Hypotonia, **9-** Tachycardia, **10:** Lethargy, **11:** Bradycardia spells, **12:** Hyperthermia, **13:**  
310 Hypothermia, **14:** Hypotension, **15:** Other skin and subcutaneous lesions, **16:** Irritability, **17:** Rhythm instability,  
311 **18:** Reduced urinary output, **19:** T° instability, **20:** Petechial rash, **21:** Sclerema

## 312 Aetiology of LOS

313



314 Baseline blood cultures were positive for 63/132 (46%) patients in the meropenem and 77/135  
 315 (57%) in the SOC arm with no differences in species distribution between study groups  
 316 (Table 3).

317 **Table 3.** Causative agents of LOS and their susceptibility to study antibiotics

| Microorganism                  | Meropenem           |                                      | SOC                    |                                                 |
|--------------------------------|---------------------|--------------------------------------|------------------------|-------------------------------------------------|
|                                | Total<br>N = 63 (%) | Susceptible to<br>meropenem<br>N (%) | Total<br>N = 77<br>(%) | Susceptible to<br>≥1 antibiotic of<br>SOC N (%) |
| <b>Gram-positive organisms</b> | <b>31 (49)</b>      | <b>8 (26)</b>                        | <b>44 (57)</b>         | <b>12 (27)</b>                                  |
| CoNS                           | 22 (35)             | 3 (14)                               | 35 (45)                | 4 (11)                                          |
| - <i>S. epidermidis</i>        | 14 (22)             | 2 (14)                               | 25 (32)                | 4 (16)                                          |
| -Other CoNS                    | 8 (13)              | 1 (13)                               | 10 (13%)               | 0                                               |
| <i>S. aureus</i>               | 5 (8)               | 3 (60)                               | 5 (6)                  | 5 (100)                                         |
| -MRSA                          | 2 (3)               | 0                                    | 1 (1)                  | 1 (100)                                         |
| GBS                            | 2 (3)               | 2 (100)                              | 3 (4)                  | 3 (100)                                         |
| <i>Enterococcus</i>            | 1 (2)               | 0                                    | 1 (1)                  | 0                                               |
| Other Gram positives           | 1 (2)               | 0                                    | 0                      | -                                               |
| <b>Gram-negative organisms</b> | <b>24 (38)</b>      | <b>22 (92)</b>                       | <b>25 (32)</b>         | <b>18 (72)</b>                                  |
| <i>Enterobacteriaceae</i>      | 22 (35)             | 20 (91)                              | 21 (27)                | 16 (76)                                         |
| - <i>Enterobacter</i> spp.     | 8 (13)              | 7 (78)                               | 10 (13)                | 6 (55)                                          |
| - <i>K. pneumoniae</i>         | 7 (11)              | 6 (86)                               | 4 (5)                  | 3 (75)                                          |

|                           |               |               |               |               |
|---------------------------|---------------|---------------|---------------|---------------|
| - <i>K. oxytoca</i>       | 4 (6)         | 4 (100)       | 3 (4)         | 3 (100)       |
| - <i>Serratia</i> spp.    | 0             | -             | 1 (1)         | 1 (100)       |
| Non-fermentative          | 2 (3)         | 2 (100)       | 2 (3)         | 1 (50)        |
| - <i>Pseudomonas</i> spp. | 2 (3)         | 2 (100)       | 2 (3)         | 1 (50)        |
| Other Gram-negative       | 0             | -             | 2 (3)         | 1 (50)        |
| <b>Mixed</b>              | <b>8 (13)</b> | <b>2 (25)</b> | <b>8 (10)</b> | <b>2 (25)</b> |

318 All differences non-significant between study arms; GBS – group B streptococci; MRSA – methicillin  
 319 resistant *S.aureus*

320 Of all Gram-negative microorganisms a total of 46 (94%) were susceptible to meropenem, 17  
 321 (59%) to cefotaxime, 2 (4%) to ampicillin and 32 (65%) to gentamicin. Altogether 32/63  
 322 (51%) of all microorganisms in the meropenem and 32/77 (42%) in the SOC arms were  
 323 susceptible to the allocated antibiotics.

### 324 **Antibiotic treatment**

325

326 Allocated therapy was used according to the protocol in 134 (99%) of patients in the  
 327 meropenem and 127 (94%) in SOC arm. In total, 65 (48%) and 67 (50%), received allocated  
 328 therapy alone and 69 (51%) and 58 (43%) received concomitantly glycopeptides in the  
 329 meropenem and SOC arms, respectively. The median duration of allocated therapy was  
 330 comparable in both arms (7.9 [IQR 4.0-9.7] days in the meropenem vs 7.0 [IQR 2.5-9.6] days  
 331 in the SOC arm;  $p = 0.089$ ) but the duration of any antibiotic therapy was shorter in the  
 332 meropenem than in the SOC arm (9.0 [IQR 7.8-12.0] vs 10.4 [IQR 8.5-13.3] days,  
 333 respectively;  $p = 0.0085$ ) (Figure 2).

### 334 **Primary efficacy analysis**

335

336 In the FAS the primary outcome (i.e. the proportion of patients with a successful outcome at  
 337 TOC) was comparable in both study arms - 44/136 (32%) in meropenem vs 31/135 (23%) in  
 338 SOC arms ( $p = 0.087$ ) (Table 4).

339 **Table 4.** Primary analysis: primary endpoint and culture-confirmed LOS. Data are presented  
 340 as numbers (%) if not stated otherwise

|                                                          | Primary endpoint (FAS) |         | Culture-confirmed LOS |         |
|----------------------------------------------------------|------------------------|---------|-----------------------|---------|
|                                                          | Meropenem              | SOC     | Meropenem             | SOC     |
|                                                          | N = 136                | N = 135 | N = 63                | N = 77  |
| Treatment success at TOC                                 | 44 (32)*               | 31 (23) | 17 (27)**             | 10 (13) |
| <b>Reasons for failure</b>                               |                        |         |                       |         |
| Modification of allocated therapy                        | 78 (57)                | 85 (63) | 43 (68)               | 59 (77) |
| Clinical signs not resolved or new signs                 | 18 (13)                | 24 (18) | 8 (13)                | 14 (18) |
| Microbiological failure                                  | 3 (2)                  | 2 (1)   | 3 (5)                 | 1 (1)   |
| Death before TOC                                         | 10 (7)                 | 6 (4)   | 3 (5)                 | 4 (5)   |
| Antibiotics not started or not-allowed antibiotics given | 2 (1)                  | 10 (7)  | 2 (3)                 | 4 (5)   |

341 \* $p=0.09$ , OR 95%CI: 1.6 (0.9 – 2.8); \*\* $p=0.02$ , OR 95% CI: 3.0 (1.2 – 7.5) (logistic model  
 342 including factors of stratification)

343 In the culture confirmed LOS population the efficacy of meropenem was greater than that of  
 344 SOC (Table 4).

345 The main reason for failure was modification of allocated therapy, which was more frequent  
 346 in the SOC than in the meropenem arm. However, time on allocated therapy did not influence  
 347 on probability of survival as shown in Figure 3.

348 **Figure 3.** Survival probability and time to modification of allocated therapy ( $p = 0.0712$ ; log-  
 349 rank test). Blue indicates meropenem and red SOC

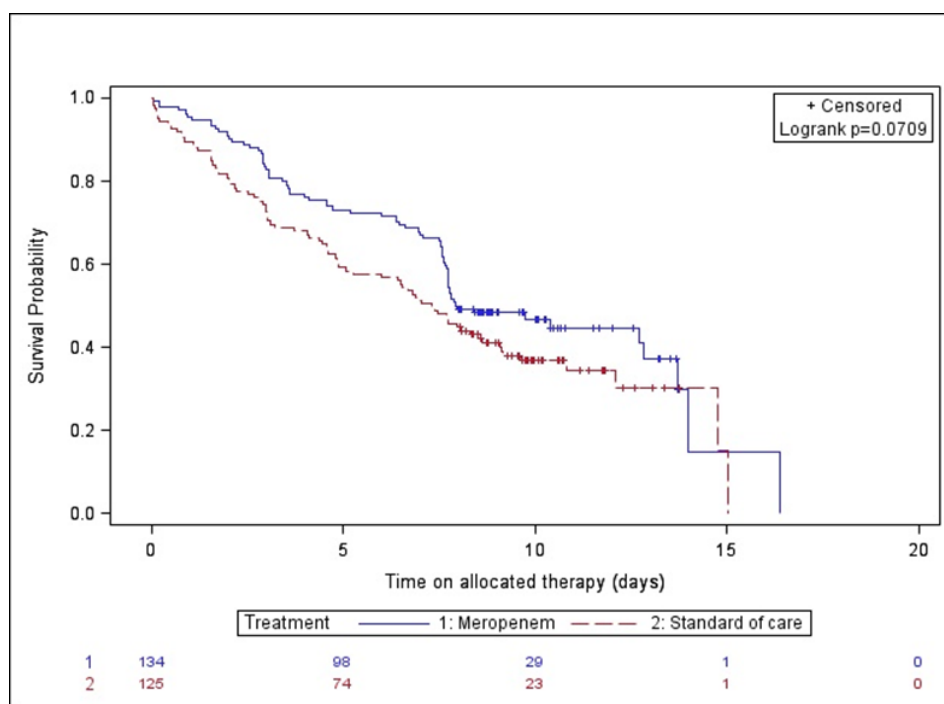

350

351 Failure was also due to completion of allocated therapy before Day 8 (38%) and diagnosis of  
 352 meningitis (13%) in the meropenem arm, while isolation of resistant microorganisms (19%),  
 353 lack of clinical response (18%) and inappropriate study antibiotics (18%) were the most  
 354 common reasons in the SOC arm (Table 5).

355 **Table 5.** Reasons for modification or discontinuation of allocated therapy

|  | Meropenem | SOC | Median duration of |
|--|-----------|-----|--------------------|
|  |           |     |                    |

|                                                                         | N = 78 (%) | N = 85 (%) | allocated<br>therapy (days;<br>IQR) |
|-------------------------------------------------------------------------|------------|------------|-------------------------------------|
| Treatment completed before<br>Day 8                                     | 30 (38)    | 10 (12)    | 7.6 (7.0-7.7)                       |
| Meningitis diagnosed                                                    | 10 (13)    | 7 (8)      | 1.1 (0.2-1.7)                       |
| Lack of response                                                        | 8 (10)     | 15 (18)    | 3.1 (0.8-4.6)                       |
| Introduction of new and/or<br>continuation of antibiotics after<br>EOAT | 8 (10)     | 5 (6)      | 9.7 (8.6-12.7)                      |
| *Study antibiotics not needed based<br>on culture results               | 5 (6)      | 15 (18)    | 3.0 (2.4-4.4)                       |
| Death                                                                   | 4 (5)      | 3 (4)      | 1.5 (0.2-5.0)                       |
| Adverse event                                                           | 4 (5)      | 4 (5)      | 1.9 (1.3-2.7)                       |
| Resistant microorganism<br>isolated                                     | 3 (4)      | 16(19)     | 2.9 (2.2-4.9)                       |
| Treatment completed after Day 14                                        | 1 (1)      | 2 (2)      | 15.0 (14.8-<br>16.4)                |
| Other                                                                   | 5 (6)      | 8 (9)      | 4.1 (1.9-5.2)                       |

356 \*All but one patient had CoNS and 1 case had methicillin susceptible *S.aureus*

357 In a posthoc analysis of the FAS population, by permitting a duration of allocated therapy  
358 between 7 and 14 days (instead of 8 to 14 days), a successful outcome was more frequent in  
359 the meropenem than in the SOC arm (65/136, 48% vs 37/135, 27%; p=0.001). There were no  
360 differences in success rate between meropenem and SOC arms if changes in the allocated

361 therapy for safety reasons were ignored (32% vs 23%) or if all changes of allocated therapy  
362 were ignored (41% vs 37%, respectively).

363 The success rate was greater for infants with Gram-negative than those with Gram-positive  
364 LOS (28% vs 13%;  $p=0.046$ ) mainly because of the modification of allocated therapy. The  
365 success rate in Gram positive sepsis was 21% in meropenem vs 7% in SOC arm and 34% vs  
366 23%, respectively in Gram negative sepsis; these differences were not statistically significant.  
367 The influence of vancomycin as empiric baseline therapy was tested in log-binominal model  
368 but it did not significantly influence the primary outcome.

### 369 **Secondary analysis and short term outcome**

370

371 A total of 251 patients were evaluated at Day 28 either by on-site visit (66%) or by telephone  
372 interview (34%) (Figure 1). In the meropenem arm 9/61 (15%) and in the SOC arm 20/70  
373 (29%) did not pass auditory tests ( $p =0.057$ ). No differences were observed in abnormal  
374 cerebral ultrasound - 27/108 (25%) vs 30/110 (27%) in meropenem vs SOC arm, respectively.  
375 New infections or clinical relapses were seen with similar frequency in both arms (Table 6).

376 **Table 6.** Secondary endpoints

|                                                | Meropenem   | SOC        | P value |
|------------------------------------------------|-------------|------------|---------|
|                                                | n/N (%)     | n/N (%)    |         |
| Success at TOC based on stratification factors |             |            |         |
| No antibiotics prior to randomisation          | 12/36 (33)  | 7/37 (19)  | 0.19    |
| At least one dose of antibiotic                | 32/100 (32) | 24/98 (24) | 0.671   |

|                                                                                         |                 |              |       |
|-----------------------------------------------------------------------------------------|-----------------|--------------|-------|
| Ampicillin+ gentamicin sites                                                            | 21/49 (43)      | 18/47 (38)   | 0.682 |
| Cefotaxime + gentamicin sites                                                           | 23/87 (26)      | 13/88 (15)   | 0.001 |
| Other factors                                                                           |                 |              |       |
| Patients with microorganisms susceptible to at least one component of allocated therapy | 13/32 (41)      | 10/32 (31)   | 0.176 |
| Alive at Day 28                                                                         | 126/136<br>(93) | 128/135 (95) | 0.462 |
| Clinical response at Day 3                                                              | 41/125 (33)     | 34/125 (27)  | 0.334 |
| Clinical response at EOAT                                                               | 74/126 (59)     | 60/127 (47)  | 0.067 |
| Clinical response at EOT                                                                | 83/122 (68)     | 76/125 (61)  | 0.235 |
| New infection and/or relapse by Day 28*                                                 | 8/44 (18)       | 5/31 (17)    | 0.865 |

377 n – number of cases

378 N – number of patients assessed for this outcome

379 \*- only patients with success at TOC were evaluated for new infection/relapses

380 The rectal swabs were available for 130, 101 and 95 patients in the meropenem and for 127,  
 381 94, 103 patients in SOC arm at baseline, EOT and Day 28/ NICU discharge visit, respectively.  
 382 Cumulative acquisition of CRGNO by Day 28 was observed in 4/94 (4%) in the meropenem  
 383 and in 12/101 (12%) in the SOC arm (p = 0.052) and highly CRGNO in 3/94 (3%) and 7/100  
 384 (7%), respectively. When comparing patients who had received at least one dose of

385 meropenem (n=170), regardless of study arm, with those not receiving meropenem, the  
 386 acquisition of CRGNO in general or of highly resistant strains was similar (8/124 (6%) vs  
 387 8/71 (11%) for CRGNO and 5/124 (4%) vs 5/70 (7%) for highly CRGNO.

## 388 Safety

389

390 A total of 193 patients (72%) had at least one adverse event (AE). All cause AEs totalled 304  
 391 and 317, with 47 and 48 serious AEs in the meropenem and SOC arms, respectively. The AEs  
 392 seen in  $\geq 3\%$  of patients are listed in Table 7. In the meropenem arm the most common AEs  
 393 were anaemia, thrombocytopenia and meningitis and in the SOC arm anaemia, abdominal  
 394 distension and apnoea. Seizures, a recognised side effect of carbapenems, were seen in four  
 395 (3%) patients in the meropenem arm and one (<1%) in the SOC arm. Renal failure occurred  
 396 in three (2%) patients in the meropenem arm and in four (3%) patients in the SOC arm.

397 **Table 7.** Comparative safety and presence of most common major clinical diagnoses in  
 398 meropenem and SOC arm

|                                             | Meropenem<br>N = 136 (%) | SOC<br>N = 132 (%) | P     |
|---------------------------------------------|--------------------------|--------------------|-------|
| Total number of patients with AE            | 91 (67)                  | 102 (77)           | 0.059 |
| Total number of patients with grade 3/4 AEs | 51 (38)                  | 61 (46)            | 0.148 |
| Total number of patients with SAEs          | 28 (21)                  | 18 (14)            | 0.131 |
| Discontinued treatment due to death or AEs  | 8 (6)                    | 7 (5)              | 0.796 |
| AE observed in more than 3% patients        |                          |                    |       |
| Anaemia                                     | 15 (11)                  | 24 (18)            | 0.097 |
| Thrombocytopenia                            | 12 (9)                   | 5 (4)              | 0.091 |
| Meningitis                                  | 11 (8)                   | 5 (4)              | 0.137 |
| Abdominal distension                        | 5 (4)                    | 10 (8)             | 0.165 |



|                                                |         |         |       |
|------------------------------------------------|---------|---------|-------|
| Oliguria                                       | 5 (4)   | 4 (3)   | 1.000 |
| Apnoea                                         | 6 (4)   | 11 (8)  | 0.188 |
| Respiratory distress                           | 5 (4)   | 3 (2)   | 0.723 |
| Sepsis                                         | 4 (3)   | 7 (5)   | 0.330 |
| Oxygen saturation decreased                    | 4 (3)   | 7 (5)   | 0.330 |
| Seizures                                       | 4 (3)   | 1 (1)   | 0.622 |
| Hyperglycaemia                                 | 3 (2)   | 7 (5)   | 0.212 |
| Major clinical diagnoses in premature neonates |         |         |       |
| RDS or HMD                                     | 53 (39) | 62 (47) | 0.186 |
| PDA requiring surgery                          | 37 (27) | 37 (28) | 0.880 |
| Anaemia prematurity                            | 33 (24) | 37 (28) | 0.483 |
| Bronchopulmonary Dysplasia                     | 27 (20) | 31 (23) | 0.470 |
| Apnoea of prematurity                          | 24 (18) | 35 (27) | 0.080 |
| Intracranial bleeding                          | 21 (15) | 24 (18) | 0.548 |
| NEC stage II or worse                          | 11 (8)  | 16 (12) | 0.273 |

399

400 Ten patients in the meropenem and seven in the SOC arm died with an overall mortality rate  
 401 of 6%. While numerical differences in mortality were seen between meropenem and SOC  
 402 arms in the FAS population, there were no differences in mortality in culture confirmed LOS  
 403 (Table 4). The mortality rate was 1% (1/80) in Gram-positive and 10% (6/60) in Gram-  
 404 negative infections. All but three patients who died had a BW <1200g.

## 405 Discussion

406

407 We have performed the largest RCT on the efficacy of antibiotics in LOS, undertaken in a  
 408 population of predominantly premature, critically ill hospitalized neonates in Europe. We

409 have shown that the mortality was low with both antibiotic regimens and the efficacy of  
410 meropenem was similar to commonly used SOC combinations based on a complex composite  
411 primary endpoint in the FAS population. If only patients with culture proven LOS were  
412 analysed the efficacy of meropenem was significantly greater than that of SOC in general but  
413 there were no differences between study arms if Gram-positive and Gram-negative sepsis  
414 were evaluated separately. Furthermore, patients randomised to meropenem had a shorter  
415 duration of antibacterial therapy than those randomised to SOC. The two study arms were  
416 similar in terms of adverse events and acquired perirectal colonisation by CRGNO.

417 The NeoMero1 study differed from previous studies in LOS in many ways. First, it was a  
418 multicentre study including countries with low to moderate antibiotic resistance rates  
419 ([http://ecdc.europa.eu/en/healthtopics/antimicrobial\\_resistance/database/](http://ecdc.europa.eu/en/healthtopics/antimicrobial_resistance/database/)) in contrast to  
420 previous single center and/or national studies [5, 19]. Second, the demanding inclusion  
421 criteria resulted in recruitment of a very sick patient population (e.g. 55% mechanically  
422 ventilated, 35% with BW of <1000g) compared to previous studies [5]. Third, only 2% of  
423 patients were ineligible (did not have LOS) and altogether 52% had culture proven LOS as  
424 opposed to 15% in a recent study of complicated intraabdominal infections [19]. Fourth,  
425 NeoMero1 had an ambitious primary endpoint that in addition to resolution or significant  
426 improvement of clinical and laboratory criteria, did not allow any changes of allocated  
427 therapy such as deviations from fixed treatment duration, dosing and/or addition of another  
428 antibiotic, in contrast to more liberal or less specific endpoints in previous studies [5, 19].

429 The most intriguing finding of this study, in comparison to others, was a relatively low  
430 success rate in terms of the composite primary endpoint in both study arms (23% in SOC vs.  
431 32% in meropenem), while mortality rates were much lower than in previous studies of LOS  
432 and in a recent Egyptian study comparing conventional and prolonged infusion of meropenem  
433 [23]. The low efficacy rate was mainly driven by the modification of allocated therapy and

434 most of all by its fixed duration of 8 to 14 days. The effect of the latter was clearly  
435 demonstrated in the post-hoc analysis in which reducing the allowed treatment duration by  
436 just one day (from 8 to 7 days) improved the success rate from 32% to 48% in the meropenem  
437 and from 23% to 27% in the SOC arms. We believe that this was due to the clinicians'  
438 decision to stop antibiotics earlier than the pre-defined duration, presumably because they felt  
439 that clinically the sepsis episode had resolved and the infant had recovered. The optimal  
440 duration of antibiotic therapy in LOS is not known [24].

441 In contrast to previous studies, we did not find an association between carbapenem use and  
442 CRGNO colonization [25-27]. Of note, our study was an RCT with strict inclusion criteria, in  
443 contrast to previous retrospective and/or observational studies which included all patients  
444 without restriction [25, 27, 28]. We should emphasize that the relatively short duration  
445 (median of 9 days) of meropenem treatment in the NeoMero1 study may be relevant. For  
446 example, Clock *et al.* (2016) showed in an observational study that perirectal colonisation  
447 with Gram-negative multi-drug resistant bacteria was associated with >10 days of meropenem  
448 treatment [18].

449 In line with previous studies, meropenem was well tolerated and all AEs in this very sick  
450 patient population were well balanced between study arms [19]. Seizures, previously reported  
451 to be related to meropenem treatment [29], were seen in higher numbers in the meropenem  
452 arm but due to very low numbers no meaningful conclusions can be drawn.

453 The study had a few limitations. First, it was an open label study with the risk of investigator -  
454 induced bias when evaluating the primary endpoint or changing allocated therapy. An open  
455 label design was selected because meropenem monotherapy was to be compared with a  
456 combination of comparator agents. Using a dummy infusion in critically ill, premature babies  
457 adds significantly to the complexity and cost of a multicenter trial and is questionable from an

458 ethical perspective. We also note that the most appropriate targets for meropenem are Gram-  
459 negative microorganisms, especially those resistant to other antibiotics like ESBL or AmpC  
460 producing organisms. Despite the demanding inclusion criteria, that well discriminated  
461 between patients with and without LOS, these criteria performed poorly in distinguishing  
462 between cases caused by Gram-positive and Gram-negative microorganisms; about half of the  
463 recruited patients still had Gram-positive infections. As long as rapid and reliable methods or  
464 biomarkers, which allow differentiation between different species, are not available,  
465 recruitment of mixed population into similar studies is unavoidable. To target antibiotic  
466 therapy more precisely, rapid and reliable tests that enable identification of microorganisms  
467 and/or their antibiotic resistance, and biomarkers that differentiate between infections and  
468 other illnesses, are urgently needed.

469 NeoMero1 is the first adequately powered RCT for LOS since the 1970s [5, 6] but several  
470 outstanding issues require further studies to be done. For example, the question of best  
471 treatment options for LOS in developing countries and/or in areas with high antibiotic  
472 resistance rates was not addressed as 92% of microorganisms were susceptible to meropenem  
473 and 72% at least to one component of SOC. As shown by us, RCTs in LOS treatment are  
474 challenging due to a vulnerable population and lack of validated disease criteria and endpoints  
475 [5, 6, 30]. There is an urgent need for cooperation between academia, pharmaceutical industry  
476 and regulators in innovating clinical research in neonatology, including defining alternative  
477 and more feasible study designs (e.g. pharmacokinetics/pharmacodynamics, rather than solely  
478 clinical endpoint based designs, enabling modelling/simulation and extrapolation from studies  
479 in adults) [6, 30]. It is critical to provide efficacy data for those infected with organisms  
480 covered specifically or exclusively by study antibiotics (e.g. ESBL or AmpC producing  
481 organisms).

482 We have also shown that the LOS criteria developed by an European Medicines Agency  
483 expert group [5] were able to discriminate well between patients with and without LOS, but  
484 further improvement and validation of these criteria is needed before adopting and  
485 implementing them into clinical trials. Indeed, other definitions have been published, which  
486 use fewer clinical and laboratory parameters, but to the best of our knowledge, these have not  
487 been tested or used in large RCTs [30]. The recent STROBE-NI consensus for reporting  
488 neonatal sepsis trials should help with this in the future [31].

489 **Conclusion:** In predominantly premature critically ill infants with LOS in Europe,  
490 meropenem treatment was not superior to SOC in terms of success at TOC, short-term hearing  
491 disturbances, safety or mortality. However, meropenem monotherapy resulted in slightly  
492 shorter treatment duration. Meropenem did not lead to enhanced colonization with CRGNOs.  
493 We recommend that meropenem should be reserved for seriously ill premature neonates with  
494 suspected or proven Gram-negative LOS, especially in NICUs in which microorganisms  
495 producing ESBL and AmpC beta-lactamases are circulating.

496

#### 497 **Acknowledgements**

498 We would like to thank all patients and their parents participating in this study.

#### 499 **Data safety monitoring board:**

500 Hugo Devlieger (chair), Jim Gray, John Van den Anker and Pollyanna Hardy

#### 501 **NeoMero Consortium:**

502 Oguz Akbas, Antonella Allegro, Davide Bilardi, Giulia Bonatti, Nijole Drazdienė, Silvia

503 Faggion, Eva Germovsek, Genny Gottardi, Tiziana Grossele, Cristina Haass, Tatiana Munera

504 Huertas, Valentina Ierardi, Sandrine Kahi, Paraskevi Karagianni, Aspasia Katragkou, Eve  
505 Kaur, Birgit Kiilaspää, Karin Kipper, Aggeliki Kontou, Victoria Kougia, Hayriye Gözde,  
506 Kanmaz Kutman, Elisabetta Lolli, Valentina Montinaro, Makis Mylonas, Kader Ben  
507 Abdelkader Emmanuelle Netzer, Clarissa Oeser, Felix Omenaca, Maria Luisa Paoloni,  
508 Simona Perniciaro, Laura Picault, Carlo Pietrasanta, Andrea Ronchi, Suzan Şahin, Yacine  
509 Saidi, Marina Spinelli, Joseph Standing, Claudia Tagliabue, Tuuli Tammekunn, Nina Tiburzi

510 **References:**

- 511 1. Vergnano S, Menson E, Kennea N, Embleton N, Russell AB, Watts T, et al. Neonatal infections  
512 in England: the NeonIN surveillance network. *Arch Dis Child Fetal Neonatal Ed.* 2011;96(1):F9-F14.  
513 doi: 10.1136/adc.2009.178798. PubMed PMID: 20876594.
- 514 2. Stoll BJ, Hansen N, Fanaroff AA, Wright LL, Carlo WA, Ehrenkranz RA, et al. Late-onset sepsis  
515 in very low birth weight neonates: the experience of the NICHD Neonatal Research Network.  
516 *Pediatrics.* 2002;110(2 Pt 1):285-91. PubMed PMID: 12165580.
- 517 3. Hornik CP, Fort P, Clark RH, Watt K, Benjamin DK, Jr., Smith PB, et al. Early and late onset  
518 sepsis in very-low-birth-weight infants from a large group of neonatal intensive care units. *Early Hum*  
519 *Dev.* 2012;88 Suppl 2:S69-74. doi: 10.1016/S0378-3782(12)70019-1. PubMed PMID: 22633519;  
520 PubMed Central PMCID: PMC3513766.
- 521 4. Cohen-Wolkowicz M, Moran C, Benjamin DK, Cotten CM, Clark RH, Benjamin DK, Jr., et al.  
522 Early and late onset sepsis in late preterm infants. *Pediatr Infect Dis J.* 2009;28(12):1052-6. PubMed  
523 PMID: 19953725; PubMed Central PMCID: PMC2798577.
- 524 5. Oeser C, Lutsar I, Metsvaht T, Turner MA, Heath PT, Sharland M. Clinical trials in neonatal  
525 sepsis. *J Antimicrob Chemother.* 2013;68(12):2733-45. doi: 10.1093/jac/dkt297. PubMed PMID:  
526 23904558.
- 527 6. Kaguelidou F, Turner MA, Choonara I, van den Anker J, Manzoni P, Alberti C, et al.  
528 Randomized controlled trials of antibiotics for neonatal infections: a systematic review. *Br J Clin*  
529 *Pharmacol.* 2013;76(1):21-9. doi: 10.1111/bcp.12113. PubMed PMID: 23488627; PubMed Central  
530 PMCID: PMC3703225.
- 531 7. Neubert A, Lukas K, Leis T, Dormann H, Brune K, Rascher W. Drug utilisation on a preterm  
532 and neonatal intensive care unit in Germany: a prospective, cohort-based analysis. *Eur J Clin*  
533 *Pharmacol.* 2010;66(1):87-95. doi: 10.1007/s00228-009-0722-8. PubMed PMID: 19756556.

- 534 8. Lass J, Kaar R, Jogi K, Varendi H, Metsvaht T, Lutsar I. Drug utilisation pattern and off-label  
535 use of medicines in Estonian neonatal units. *Eur J Clin Pharmacol*. 2011;67(12):1263-71. doi:  
536 10.1007/s00228-011-1072-x. PubMed PMID: 21667125.
- 537 9. Spyridis N, Syridou G, Goossens H, Versporten A, Kopsidas J, Kourlaba G, et al. Variation in  
538 paediatric hospital antibiotic guidelines in Europe. *Arch Dis Child*. 2016;101(1):72-6. doi:  
539 10.1136/archdischild-2015-308255. PubMed PMID: 26416900.
- 540 10. Lutsar I, Chazallon C, Carducci FI, Trafojer U, Abdelkader B, de Cabre VM, et al. Current  
541 management of late onset neonatal bacterial sepsis in five European countries. *Eur J Pediatr*.  
542 2014;173(8):997-1004. doi: 10.1007/s00431-014-2279-5. PubMed PMID: 24522326.
- 543 11. Metsvaht T, Nellis G, Varendi H, Nunn AJ, Graham S, Rieutord A, et al. High variability in the  
544 dosing of commonly used antibiotics revealed by a Europe-wide point prevalence study: implications  
545 for research and dissemination. *BMC Pediatr*. 2015;15:41. doi: 10.1186/s12887-015-0359-y. PubMed  
546 PMID: 25880733; PubMed Central PMCID: PMC4407781.
- 547 12. Bielicki JA, Lundin R, Sharland M, Project A. Antibiotic Resistance Prevalence in Routine  
548 Bloodstream Isolates from Children's Hospitals Varies Substantially from Adult Surveillance Data in  
549 Europe. *Pediatr Infect Dis J*. 2015;34(7):734-41. doi: 10.1097/INF.0000000000000652. PubMed PMID:  
550 25607829.
- 551 13. Freire-Moran L, Aronsson B, Manz C, Gyssens IC, So AD, Monnet DL, et al. Critical shortage of  
552 new antibiotics in development against multidrug-resistant bacteria-Time to react is now. *Drug Resist*  
553 *Updat*. 2011;14(2):118-24. doi: 10.1016/j.drup.2011.02.003. PubMed PMID: 21435939.
- 554 14. Garazzino S, Lutsar I, Bertaina C, Tovo PA, Sharland M. New antibiotics for paediatric use: a  
555 review of a decade of regulatory trials submitted to the European Medicines Agency from 2000--why  
556 aren't we doing better? *Int J Antimicrob Agents*. 2013;42(2):99-118. doi:  
557 10.1016/j.ijantimicag.2013.05.001. PubMed PMID: 23810180.



- 558 15. Le Doare K, Bielicki J, Heath PT, Sharland M. Systematic Review of Antibiotic Resistance Rates  
559 Among Gram-Negative Bacteria in Children With Sepsis in Resource-Limited Countries. *J Pediatric*  
560 *Infect Dis Soc.* 2015;4(1):11-20. doi: 10.1093/jpids/piu014. PubMed PMID: 26407352.
- 561 16. Pacifici GM, Allegaert K. Clinical pharmacology of carbapenems in neonates. *J Chemother.*  
562 2014;26(2):67-73. doi: 10.1179/1973947813Y.0000000110. PubMed PMID: 24090536.
- 563 17. Versporten A, Bielicki J, Drapier N, Sharland M, Goossens H, group Ap. The Worldwide  
564 Antibiotic Resistance and Prescribing in European Children (ARPEC) point prevalence survey:  
565 developing hospital-quality indicators of antibiotic prescribing for children. *J Antimicrob Chemother.*  
566 2016;71(4):1106-17. doi: 10.1093/jac/dkv418. PubMed PMID: 26747104.
- 567 18. Clock SA, Ferng YH, Tabibi S, Alba L, Patel SJ, Jia H, et al. Colonization With Antimicrobial-  
568 Resistant Gram-Negative Bacilli at Neonatal Intensive Care Unit Discharge. *J Pediatric Infect Dis Soc.*  
569 2016. doi: 10.1093/jpids/piw014. PubMed PMID: 27021036.
- 570 19. Cohen-Wolkowicz M, Poindexter B, Bidegain M, Weitkamp JH, Schelonka RL, Randolph DA, et  
571 al. Safety and effectiveness of meropenem in infants with suspected or complicated intra-abdominal  
572 infections. *Clin Infect Dis.* 2012;55(11):1495-502. doi: 10.1093/cid/cis758. PubMed PMID: 22955430;  
573 PubMed Central PMCID: PMC3491861.
- 574 20. Lutsar I, Trafojer UM, Heath PT, Metsvaht T, Standing J, Esposito S, et al. Meropenem vs  
575 standard of care for treatment of late onset sepsis in children of less than 90 days of age: study  
576 protocol for a randomised controlled trial. *Trials.* 2011;12:215. doi: 10.1186/1745-6215-12-215.  
577 PubMed PMID: 21958494; PubMed Central PMCID: PMC3193806.
- 578 21. Goldstein B, Giroir B, Randolph A, International Consensus Conference on Pediatric S.  
579 International pediatric sepsis consensus conference: definitions for sepsis and organ dysfunction in  
580 pediatrics. *Pediatr Crit Care Med.* 2005;6(1):2-8. doi: 10.1097/01.PCC.0000149131.72248.E6.  
581 PubMed PMID: 15636651.

- 582 22. Germovsek E, Lutsar I, Kipper K, Karlsson MO, Planche T, Chazallon C, et al. Plasma and CSF  
583 pharmacokinetics of meropenem in neonates and young infants: results from the NeoMero studies. J  
584 Antimicrob Chemother. 2018. doi: 10.1093/jac/dky128. PubMed PMID: 29684147.
- 585 23. Shabaan AE, Nour I, Elsayed Eldeglia H, Nasef N, Shouman B, Abdel-Hady H. Conventional  
586 Versus Prolonged Infusion of Meropenem in Neonates With Gram-negative Late-onset Sepsis: A  
587 Randomized Controlled Trial. *Pediatr Infect Dis J*. 2017;36(4):358-63. doi:  
588 10.1097/INF.0000000000001445. PubMed PMID: 27918382.
- 589 24. McMullan BJ, Andresen D, Blyth CC, Avent ML, Bowen AC, Britton PN, et al. Antibiotic  
590 duration and timing of the switch from intravenous to oral route for bacterial infections in children:  
591 systematic review and guidelines. *Lancet Infect Dis*. 2016;16(8):e139-52. doi: 10.1016/S1473-  
592 3099(16)30024-X. PubMed PMID: 27321363.
- 593 25. Barron MA, Richardson K, Jeffres M, McCollister B. Risk factors and influence of carbapenem  
594 exposure on the development of carbapenem resistant *Pseudomonas aeruginosa* bloodstream  
595 infections and infections at sterile sites. *Springerplus*. 2016;5(1):755. doi: 10.1186/s40064-016-2438-  
596 4. PubMed PMID: 27386239; PubMed Central PMCID: PMC4912523.
- 597 26. Logan LK. Carbapenem-resistant enterobacteriaceae: an emerging problem in children. *Clin*  
598 *Infect Dis*. 2012;55(6):852-9. doi: 10.1093/cid/cis543. PubMed PMID: 22700827.
- 599 27. Akturk H, Sutcu M, Somer A, Aydin D, Cihan R, Ozdemir A, et al. Carbapenem-resistant  
600 *Klebsiella pneumoniae* colonization in pediatric and neonatal intensive care units: risk factors for  
601 progression to infection. *Braz J Infect Dis*. 2016;20(2):134-40. doi: 10.1016/j.bjid.2015.12.004.  
602 PubMed PMID: 26867474.
- 603 28. Karaaslan A, Soysal A, Altinkanat Gelmez G, Kepenekli Kadayifci E, Soyletir G, Bakir M.  
604 Molecular characterization and risk factors for carbapenem-resistant Gram-negative bacilli  
605 colonization in children: emergence of NDM-producing *Acinetobacter baumannii* in a newborn  
606 intensive care unit in Turkey. *J Hosp Infect*. 2016;92(1):67-72. doi: 10.1016/j.jhin.2015.09.011.  
607 PubMed PMID: 26601601.

- 608 29. Cannon JP, Lee TA, Clark NM, Setlak P, Grim SA. The risk of seizures among the carbapenems:  
609 a meta-analysis. *J Antimicrob Chemother.* 2014;69(8):2043-55. doi: 10.1093/jac/dku111. PubMed  
610 PMID: 24744302.
- 611 30. Wynn JL, Wong HR, Shanley TP, Bizzarro MJ, Saiman L, Polin RA. Time for a neonatal-specific  
612 consensus definition for sepsis. *Pediatr Crit Care Med.* 2014;15(6):523-8. doi:  
613 10.1097/PCC.000000000000157. PubMed PMID: 24751791; PubMed Central PMCID:  
614 PMCPMC4087075.
- 615 31. Fitchett EJ, Seale AC, Vergnano S, Sharland M, Heath PT, Saha SK, et al. Strengthening the  
616 Reporting of Observational Studies in Epidemiology for Newborn Infection (STROBE-NI): an extension  
617 of the STROBE statement for neonatal infection research. *Lancet Infect Dis.* 2016;16(10):e202-13.  
618 doi: 10.1016/S1473-3099(16)30082-2. PubMed PMID: 27633910.
- 619

620 **Acknowledgements**

621 We would like to thank all patients and their parents participating in this study.

622 **Data safety monitoring board:**

623 Hugo Devlieger (chair), Jim Gray, John Van den Anker and Pollyanna Hardy

624 **NeoMero Consortium:**

625 Oguz Akbas, Antonella Allegro, Davide Bilardi, Giulia Bonatti, Nijole Drazdienė, Silvia  
626 Faggion, Eva Germovsek, Genny Gottardi, Tiziana Grossele, Cristina Haass, Tatiana Munera  
627 Huertas, Valentina Ierardi, Sandrine Kahi, Paraskevi Karagianni, Aspasia Katragkou, Eve  
628 Kaur, Birgit Kiilaspää, Karin Kipper, Aggeliki Kontou, Victoria Kougia, Hayriye Gözde,  
629 Kanmaz Kutman, Elisabetta Lolli, Valentina Montinaro, Makis Mylonas, Kader Ben  
630 Abdelkader Emmanuelle Netzer, Clarissa Oeser, Felix Omenaca, Maria Luisa Paoloni,  
631 Simona Perniciaro, Laura Picault, Carlo Pietrasanta, Andrea Ronchi, Suzan Şahin, Yacine  
632 Saidi, Marina Spinelli, Joseph Standing, Claudia Tagliabue, Tuuli Tammekunn, Nina Tiburzi

633
